# Supplementary material for: Evolution of fractal patterns in lead-free zero-dimensional perovskite Cs2InBr5(H2O)
Source: Royal Society of Chemistry journal article supplement (doi:10.1039/d4ce00204k), 2024-01-01
Supplement: d4ce00204k1.pdf [file d4ce00204k1.pdf]

## Supporting Information

# Evolution of fractal patterns in lead-free, zero-dimensional perovskite $\text{Cs}_2\text{InBr}_5(\text{H}_2\text{O})$

Wanyin Ge<sup>a,\*</sup>, Maohao Yang<sup>a</sup>, Masaki Saruyama<sup>2</sup>, Kenshi Matsumoto<sup>2</sup>, Ryota Sato<sup>2</sup>,  
Haruka Takekuma<sup>2</sup>, Ryo Takahata<sup>2</sup>, and Toshiharu Teranishi<sup>2,\*</sup>

<sup>a</sup> School of Materials Science and Engineering, Shaanxi University of Science and Technology, Xi'an, Shaanxi 710021, P. R. China.

<sup>b</sup> Institute for Chemical Research, Kyoto University, Gokasho, Uji, Kyoto 611-0011, Japan

\* Email: [gewanyin@sust.edu.cn](mailto:gewanyin@sust.edu.cn); [teranisi@scl.kyoto-u.ac.jp](mailto:teranisi@scl.kyoto-u.ac.jp).

### The standard card information of $\text{Cs}_2\text{InBr}_5(\text{H}_2\text{O})$

Compound name: Cesium Indium Bromide Hydrate  
Common name: Dicaesium indium pentabromide hydrate  
PDF index name: Cesium Indium Bromide Hydrate  
Chemical formula:  $\text{Cs}_2\text{InBr}_5(\text{H}_2\text{O})$   
PDF: 01-087-4184

Structure: Orthorhombic  
Space group: Pnma  
Space group No.: 62  
a (Å): 14.8763  
b (Å): 10.8116  
c (Å): 7.6437  
Alpha (°): 90.0000  
Beta (°): 90.0000  
Gamma (°): 90.0000  
Volume of cell ( $10^6 \text{ pm}^3$ ): 1229.39  
Z: 4.00  
RIR: 2.71

Reference: Zhou, Lei; Liao, Jin-Feng; Huang, Zeng-Guang; Wei, Jun-Hua; Wang, Xu-Dong; Li, Wen-Guang; Chen, Hong-Yan; Kuang, Dai-Bin; Su, Cheng-Yong, *Angew. Chem.*,

**Peak lists**

| No. | h | k | l | d [Å]   | 2Theta [°] | I [%] |
|-----|---|---|---|---------|------------|-------|
| 1   | 2 | 0 | 0 | 7.43815 | 11.888     | 5.0   |
| 2   | 1 | 0 | 1 | 6.79874 | 13.011     | 4.4   |
| 3   | 0 | 1 | 1 | 6.24140 | 14.179     | 42.5  |
| 4   | 2 | 1 | 0 | 6.12798 | 14.443     | 43.2  |
| 5   | 1 | 1 | 1 | 5.75537 | 15.383     | 2.6   |
| 6   | 0 | 2 | 0 | 5.40580 | 16.384     | 1.3   |
| 7   | 2 | 0 | 1 | 5.33075 | 16.617     | 1.3   |
| 8   | 2 | 1 | 1 | 4.78117 | 18.543     | 1.2   |
| 9   | 2 | 2 | 0 | 4.37292 | 20.291     | 1.2   |
| 10  | 1 | 2 | 1 | 4.23128 | 20.978     | 0.3   |
| 11  | 3 | 0 | 1 | 4.16004 | 21.342     | 0.6   |
| 12  | 3 | 1 | 1 | 3.88255 | 22.887     | 1.3   |
| 13  | 0 | 0 | 2 | 3.82185 | 23.255     | 7.6   |
| 14  | 2 | 2 | 1 | 3.79567 | 23.418     | 42.2  |
| 15  | 4 | 0 | 0 | 3.71907 | 23.907     | 18.9  |
| 16  | 1 | 0 | 2 | 3.70164 | 24.022     | 18.8  |
| 17  | 4 | 1 | 0 | 3.51682 | 25.304     | 0.1   |
| 18  | 1 | 1 | 2 | 3.50207 | 25.413     | 0.2   |
| 19  | 2 | 0 | 2 | 3.39937 | 26.194     | 0.3   |
| 20  | 4 | 0 | 1 | 3.34423 | 26.634     | 20.8  |
| 21  | 3 | 2 | 1 | 3.29684 | 27.024     | 37.5  |
| 22  | 0 | 3 | 1 | 3.25972 | 27.338     | 8.7   |
| 23  | 2 | 1 | 2 | 3.24324 | 27.479     | 12.4  |
| 24  | 2 | 3 | 0 | 3.24324 | 27.479     | 12.4  |
| 25  | 4 | 1 | 1 | 3.19488 | 27.903     | 5.7   |
| 26  | 0 | 2 | 2 | 3.12070 | 28.581     | 38.3  |
| 27  | 4 | 2 | 0 | 3.06399 | 29.121     | 100.0 |
| 28  | 1 | 2 | 2 | 3.05422 | 29.216     | 88.7  |
| 29  | 3 | 0 | 2 | 3.02710 | 29.484     | 56.3  |
| 30  | 2 | 3 | 1 | 2.98560 | 29.903     | 0.9   |
| 31  | 3 | 1 | 2 | 2.91500 | 30.645     | 2.9   |
| 32  | 2 | 2 | 2 | 2.87769 | 31.052     | 0.3   |
| 33  | 4 | 2 | 1 | 2.84401 | 31.430     | 9.4   |
| 34  | 5 | 0 | 1 | 2.77262 | 32.261     | 1.9   |
| 35  | 0 | 4 | 0 | 2.70290 | 33.116     | 79.5  |
| 36  | 4 | 0 | 2 | 2.66538 | 33.596     | 51.3  |
| 37  | 3 | 2 | 2 | 2.64119 | 33.913     | 1.4   |
| 38  | 4 | 1 | 2 | 2.58789 | 34.634     | 0.7   |
| 39  | 4 | 3 | 0 | 2.58789 | 34.634     | 0.7   |
| 40  | 2 | 4 | 0 | 2.54037 | 35.303     | 0.7   |
| 41  | 1 | 0 | 3 | 2.51133 | 35.724     | 2.0   |
| 42  | 1 | 4 | 1 | 2.51133 | 35.724     | 2.0   |

---

|    |   |   |   |         |        |      |
|----|---|---|---|---------|--------|------|
| 43 | 2 | 3 | 2 | 2.47285 | 36.300 | 1.8  |
| 44 | 1 | 1 | 3 | 2.45138 | 36.629 | 2.4  |
| 45 | 4 | 3 | 1 | 2.45138 | 36.629 | 2.4  |
| 46 | 6 | 1 | 0 | 2.41665 | 37.174 | 1.1  |
| 47 | 2 | 0 | 3 | 2.41041 | 37.274 | 3.0  |
| 48 | 2 | 4 | 1 | 2.41041 | 37.274 | 3.0  |
| 49 | 4 | 2 | 2 | 2.39059 | 37.595 | 1.7  |
| 50 | 5 | 0 | 2 | 2.34772 | 38.308 | 24.1 |
| 51 | 3 | 3 | 2 | 2.31791 | 38.820 | 1.1  |
| 52 | 6 | 1 | 1 | 2.30423 | 39.060 | 0.7  |
| 53 | 5 | 1 | 2 | 2.29425 | 39.237 | 5.5  |
| 54 | 1 | 2 | 3 | 2.27756 | 39.536 | 6.8  |
| 55 | 3 | 0 | 3 | 2.26625 | 39.742 | 4.4  |
| 56 | 3 | 4 | 1 | 2.26625 | 39.742 | 4.4  |
| 57 | 6 | 2 | 0 | 2.25365 | 39.973 | 1.9  |
| 58 | 3 | 1 | 3 | 2.21804 | 40.643 | 3.3  |
| 59 | 0 | 4 | 2 | 2.20679 | 40.859 | 2.9  |
| 60 | 2 | 2 | 3 | 2.20147 | 40.963 | 1.4  |
| 61 | 5 | 3 | 1 | 2.19752 | 41.040 | 1.1  |
| 62 | 4 | 4 | 0 | 2.18646 | 41.257 | 9.4  |
| 63 | 1 | 4 | 2 | 2.18290 | 41.327 | 9.2  |
| 64 | 6 | 2 | 1 | 2.16165 | 41.752 | 12.0 |
| 65 | 5 | 2 | 2 | 2.15341 | 41.919 | 1.9  |
| 66 | 4 | 3 | 2 | 2.14296 | 42.134 | 0.4  |
| 67 | 4 | 0 | 3 | 2.10215 | 42.992 | 10.1 |
| 68 | 4 | 4 | 1 | 2.10215 | 42.992 | 10.1 |
| 69 | 3 | 2 | 3 | 2.09002 | 43.254 | 7.6  |
| 70 | 6 | 0 | 2 | 2.08067 | 43.458 | 3.2  |
| 71 | 0 | 5 | 1 | 2.08067 | 43.458 | 3.2  |
| 72 | 2 | 5 | 0 | 2.07636 | 43.553 | 3.7  |
| 73 | 1 | 3 | 3 | 2.06331 | 43.842 | 3.9  |
| 74 | 4 | 1 | 3 | 2.06331 | 43.842 | 3.9  |
| 75 | 7 | 0 | 1 | 2.04752 | 44.198 | 7.0  |
| 76 | 6 | 1 | 2 | 2.04256 | 44.311 | 4.5  |
| 77 | 6 | 3 | 0 | 2.04256 | 44.311 | 4.5  |
| 78 | 3 | 4 | 2 | 2.01615 | 44.923 | 29.8 |
| 79 | 2 | 3 | 3 | 2.00357 | 45.221 | 0.9  |
| 80 | 2 | 5 | 1 | 2.00357 | 45.221 | 0.9  |
| 81 | 5 | 3 | 2 | 1.96713 | 46.106 | 2.4  |
| 82 | 4 | 2 | 3 | 1.95906 | 46.307 | 0.6  |
| 83 | 6 | 2 | 2 | 1.94127 | 46.757 | 0.5  |
| 84 | 5 | 0 | 3 | 1.93526 | 46.911 | 3.0  |
| 85 | 5 | 4 | 1 | 1.93526 | 46.911 | 3.0  |
| 86 | 3 | 3 | 3 | 1.91846 | 47.346 | 2.0  |
| 87 | 3 | 5 | 1 | 1.91846 | 47.346 | 2.0  |
| 88 | 0 | 0 | 4 | 1.91093 | 47.544 | 1.3  |

---

---

|     |   |   |   |         |        |      |
|-----|---|---|---|---------|--------|------|
| 89  | 1 | 0 | 4 | 1.89783 | 47.893 | 36.9 |
| 90  | 4 | 4 | 2 | 1.89783 | 47.893 | 36.9 |
| 91  | 1 | 1 | 4 | 1.86688 | 48.738 | 4.3  |
| 92  | 1 | 5 | 2 | 1.86688 | 48.738 | 4.3  |
| 93  | 7 | 0 | 2 | 1.85954 | 48.943 | 11.5 |
| 94  | 8 | 0 | 0 | 1.85954 | 48.943 | 11.5 |
| 95  | 2 | 0 | 4 | 1.85082 | 49.189 | 1.4  |
| 96  | 1 | 4 | 3 | 1.83978 | 49.504 | 1.1  |
| 97  | 7 | 1 | 2 | 1.83263 | 49.710 | 0.7  |
| 98  | 8 | 1 | 0 | 1.83263 | 49.710 | 0.7  |
| 99  | 5 | 2 | 3 | 1.82449 | 49.947 | 1.7  |
| 100 | 2 | 5 | 2 | 1.82449 | 49.947 | 1.7  |
| 101 | 4 | 3 | 3 | 1.81568 | 50.206 | 3.4  |
| 102 | 4 | 5 | 1 | 1.81568 | 50.206 | 3.4  |
| 103 | 8 | 0 | 1 | 1.80684 | 50.469 | 6.2  |
| 104 | 2 | 4 | 3 | 1.80167 | 50.624 | 5.3  |
| 105 | 0 | 2 | 4 | 1.80167 | 50.624 | 5.3  |
| 106 | 7 | 3 | 1 | 1.78212 | 51.219 | 4.7  |
| 107 | 8 | 1 | 1 | 1.78212 | 51.219 | 4.7  |
| 108 | 5 | 4 | 2 | 1.77246 | 51.519 | 17.9 |
| 109 | 7 | 2 | 2 | 1.75656 | 52.020 | 3.3  |
| 110 | 8 | 2 | 0 | 1.75656 | 52.020 | 3.3  |
| 111 | 2 | 2 | 4 | 1.75104 | 52.196 | 1.2  |
| 112 | 2 | 6 | 0 | 1.75104 | 52.196 | 1.2  |
| 113 | 3 | 4 | 3 | 1.73660 | 52.663 | 3.1  |
| 114 | 8 | 2 | 1 | 1.71365 | 53.424 | 8.9  |
| 115 | 5 | 3 | 3 | 1.70705 | 53.647 | 4.0  |
| 116 | 2 | 6 | 1 | 1.70705 | 53.647 | 4.0  |
| 117 | 4 | 0 | 4 | 1.69969 | 53.898 | 1.2  |
| 118 | 3 | 2 | 4 | 1.69336 | 54.116 | 8.0  |
| 119 | 1 | 3 | 4 | 1.67750 | 54.670 | 2.1  |
| 120 | 4 | 1 | 4 | 1.67750 | 54.670 | 2.1  |
| 121 | 8 | 0 | 2 | 1.67212 | 54.861 | 0.3  |
| 122 | 8 | 3 | 0 | 1.65348 | 55.532 | 4.2  |
| 123 | 3 | 6 | 1 | 1.65348 | 55.532 | 4.2  |
| 124 | 2 | 3 | 4 | 1.64640 | 55.792 | 0.3  |
| 125 | 1 | 5 | 3 | 1.63861 | 56.081 | 0.5  |
| 126 | 7 | 0 | 3 | 1.63210 | 56.324 | 7.9  |
| 127 | 7 | 4 | 1 | 1.63210 | 56.324 | 7.9  |
| 128 | 6 | 5 | 0 | 1.62986 | 56.409 | 5.8  |
| 129 | 0 | 6 | 2 | 1.62986 | 56.409 | 5.8  |
| 130 | 1 | 6 | 2 | 1.62162 | 56.721 | 16.4 |
| 131 | 4 | 6 | 0 | 1.62162 | 56.721 | 16.4 |
| 132 | 7 | 1 | 3 | 1.61520 | 56.967 | 3.4  |
| 133 | 8 | 3 | 1 | 1.61520 | 56.967 | 3.4  |
| 134 | 5 | 0 | 4 | 1.60786 | 57.251 | 1.2  |

---

---

|     |    |   |   |         |        |      |
|-----|----|---|---|---------|--------|------|
| 135 | 2  | 5 | 3 | 1.60786 | 57.251 | 1.2  |
| 136 | 8  | 2 | 2 | 1.59744 | 57.659 | 3.0  |
| 137 | 9  | 1 | 1 | 1.59744 | 57.659 | 3.0  |
| 138 | 6  | 3 | 3 | 1.59382 | 57.803 | 0.7  |
| 139 | 6  | 5 | 1 | 1.59382 | 57.803 | 0.7  |
| 140 | 5  | 5 | 2 | 1.59050 | 57.935 | 1.9  |
| 141 | 2  | 6 | 2 | 1.59050 | 57.935 | 1.9  |
| 142 | 4  | 6 | 1 | 1.58631 | 58.102 | 1.4  |
| 143 | 5  | 4 | 3 | 1.57351 | 58.621 | 1.7  |
| 144 | 0  | 4 | 4 | 1.56236 | 59.081 | 11.4 |
| 145 | 7  | 2 | 3 | 1.56236 | 59.081 | 11.4 |
| 146 | 1  | 4 | 4 | 1.55184 | 59.521 | 16.8 |
| 147 | 5  | 2 | 4 | 1.54113 | 59.977 | 6.4  |
| 148 | 7  | 4 | 2 | 1.53199 | 60.372 | 10.8 |
| 149 | 8  | 4 | 0 | 1.53199 | 60.372 | 10.8 |
| 150 | 2  | 4 | 4 | 1.52711 | 60.585 | 1.4  |
| 151 | 1  | 0 | 5 | 1.52073 | 60.866 | 0.4  |
| 152 | 9  | 0 | 2 | 1.51711 | 61.027 | 0.5  |
| 153 | 2  | 7 | 0 | 1.51392 | 61.169 | 0.8  |
| 154 | 0  | 7 | 1 | 1.51392 | 61.169 | 0.8  |
| 155 | 1  | 1 | 5 | 1.50719 | 61.472 | 1.6  |
| 156 | 4  | 5 | 3 | 1.50719 | 61.472 | 1.6  |
| 157 | 8  | 0 | 3 | 1.50212 | 61.702 | 6.3  |
| 158 | 8  | 4 | 1 | 1.50212 | 61.702 | 6.3  |
| 159 | 2  | 0 | 5 | 1.49905 | 61.842 | 1.8  |
| 160 | 6  | 5 | 2 | 1.49905 | 61.842 | 1.8  |
| 161 | 4  | 6 | 2 | 1.49280 | 62.130 | 0.4  |
| 162 | 7  | 3 | 3 | 1.48840 | 62.334 | 2.3  |
| 163 | 3  | 4 | 4 | 1.48840 | 62.334 | 2.3  |
| 164 | 2  | 1 | 5 | 1.48328 | 62.573 | 0.6  |
| 165 | 6  | 4 | 3 | 1.48328 | 62.573 | 0.6  |
| 166 | 10 | 1 | 0 | 1.47374 | 63.025 | 1.0  |
| 167 | 9  | 3 | 1 | 1.47374 | 63.025 | 1.0  |
| 168 | 1  | 2 | 5 | 1.46405 | 63.490 | 1.7  |
| 169 | 1  | 6 | 3 | 1.46405 | 63.490 | 1.7  |
| 170 | 9  | 2 | 2 | 1.46068 | 63.654 | 3.1  |
| 171 | 6  | 2 | 4 | 1.45750 | 63.809 | 1.6  |
| 172 | 6  | 6 | 0 | 1.45750 | 63.809 | 1.6  |
| 173 | 10 | 1 | 1 | 1.44722 | 64.317 | 0.8  |
| 174 | 8  | 2 | 3 | 1.44722 | 64.317 | 0.8  |
| 175 | 5  | 5 | 3 | 1.44310 | 64.523 | 1.4  |
| 176 | 2  | 2 | 5 | 1.44310 | 64.523 | 1.4  |
| 177 | 4  | 4 | 4 | 1.43884 | 64.737 | 1.0  |
| 178 | 10 | 2 | 0 | 1.43431 | 64.966 | 0.7  |
| 179 | 6  | 6 | 1 | 1.43184 | 65.092 | 2.6  |
| 180 | 1  | 5 | 4 | 1.42531 | 65.428 | 1.8  |

---

|     |    |   |   |         |        |     |
|-----|----|---|---|---------|--------|-----|
| 181 | 1  | 7 | 2 | 1.42531 | 65.428 | 1.8 |
| 182 | 7  | 0 | 4 | 1.42096 | 65.653 | 3.4 |
| 183 | 8  | 4 | 2 | 1.42096 | 65.653 | 3.4 |
| 184 | 4  | 0 | 5 | 1.41395 | 66.020 | 0.5 |
| 185 | 10 | 2 | 1 | 1.41043 | 66.206 | 3.3 |
| 186 | 3  | 6 | 3 | 1.41043 | 66.206 | 3.3 |
| 187 | 1  | 3 | 5 | 1.40110 | 66.704 | 0.8 |
| 188 | 4  | 1 | 5 | 1.40110 | 66.704 | 0.8 |
| 189 | 6  | 3 | 4 | 1.39709 | 66.921 | 1.5 |
| 190 | 7  | 4 | 3 | 1.39709 | 66.921 | 1.5 |
| 191 | 8  | 5 | 1 | 1.38668 | 67.490 | 3.9 |
| 192 | 9  | 0 | 3 | 1.38668 | 67.490 | 3.9 |
| 193 | 5  | 4 | 4 | 1.38185 | 67.758 | 1.3 |
| 194 | 2  | 3 | 5 | 1.38185 | 67.758 | 1.3 |
| 195 | 7  | 2 | 4 | 1.37508 | 68.137 | 1.0 |
| 196 | 10 | 3 | 0 | 1.37508 | 68.137 | 1.0 |
| 197 | 4  | 6 | 3 | 1.36793 | 68.543 | 1.5 |
| 198 | 4  | 2 | 5 | 1.36793 | 68.543 | 1.5 |

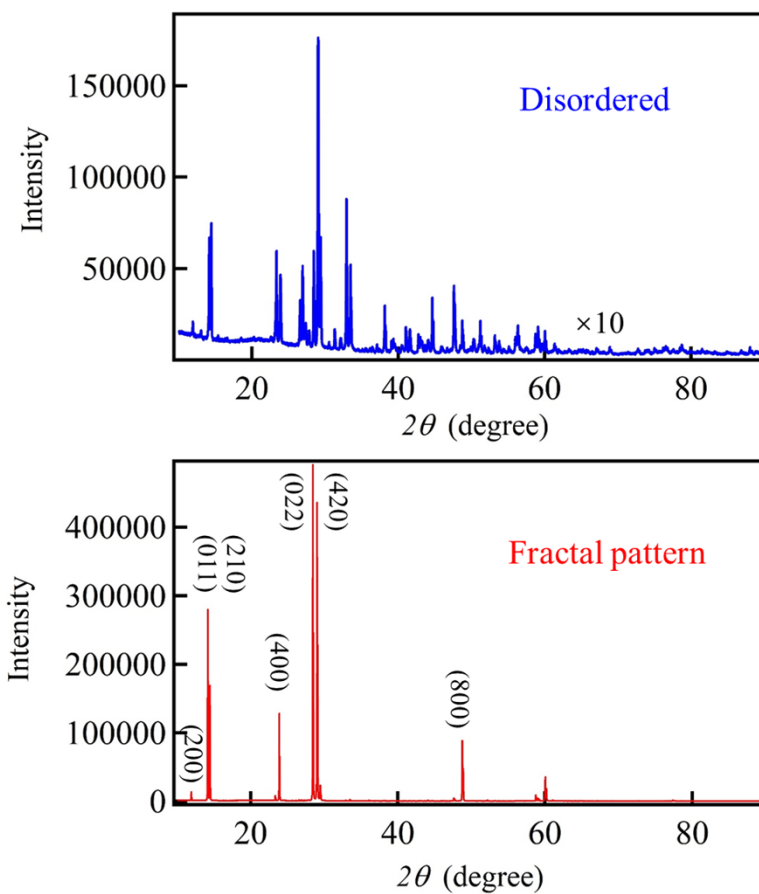

Fig. S1 XRD patterns of disordered sample and fractal patterns of  $\text{Cs}_2\text{InBr}_5(\text{H}_2\text{O})\text{:Sb}$
